# Supplementary material
Source: PubMed Central journal article supplement (PMC4487824)
Supplement: NIHMS62929-supplement-Appendix.pdf [file NIHMS62929-supplement-Appendix.pdf]

# THE LANCET

## **Supplementary appendix**

This appendix formed part of the original submission and has been peer reviewed. We post it as supplied by the authors.

Supplement to: Elliott MJ, De Coppi P, Speggiorin S, et al. Stem-cell-based, tissue engineered tracheal replacement in a child: a 2-year follow-up study. *Lancet* 2012; published online July 26. [http://dx.doi.org/10.1016/S0140-6736\(12\)60737-5](http://dx.doi.org/10.1016/S0140-6736(12)60737-5).

Supplementary Figure 1.

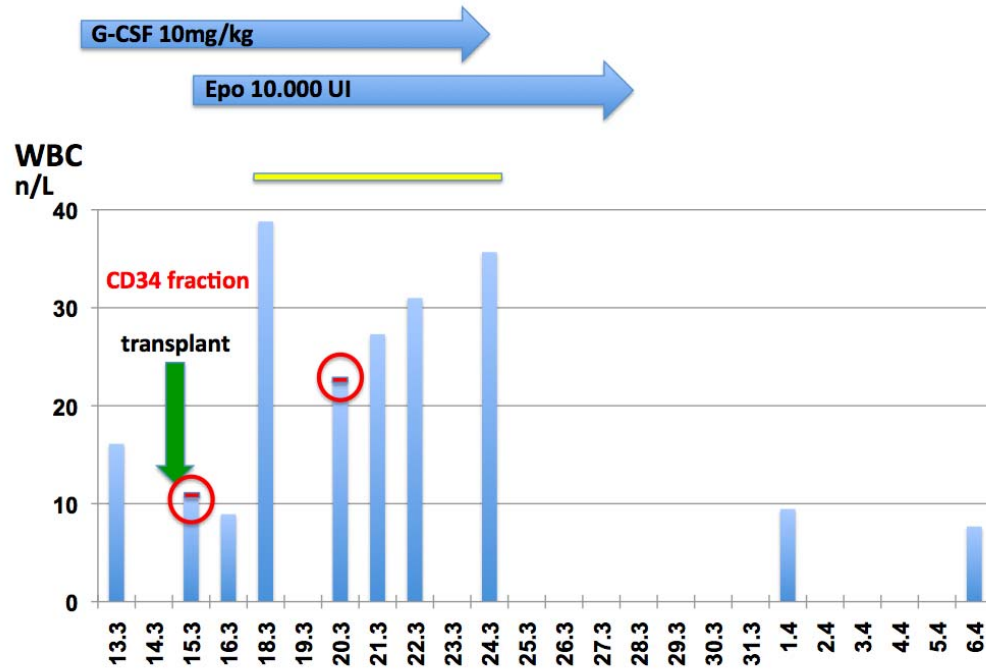

The histogram shows white blood count (n/L, vertical axis), plotted against date (day.month). Hollow arrows show dates of intravenous administration of exogenous cytokines (G-CSF = granulocyte colony stimulating factor; EPO= human recombinant erythropoietin) Solid bars show dates of dense tracheal exudates. The number of circulating white blood cells normalized at one week
